# Supplementary material
Source: publisher site journal article supplement (https://www.e-cmh.org/upload/media/cmh-2022-0205-Supplementary-Fig-6.pdf)
Supplement: Supplementary file 1 [file cmh-2022-0205-Supplementary-Fig-6.pdf]

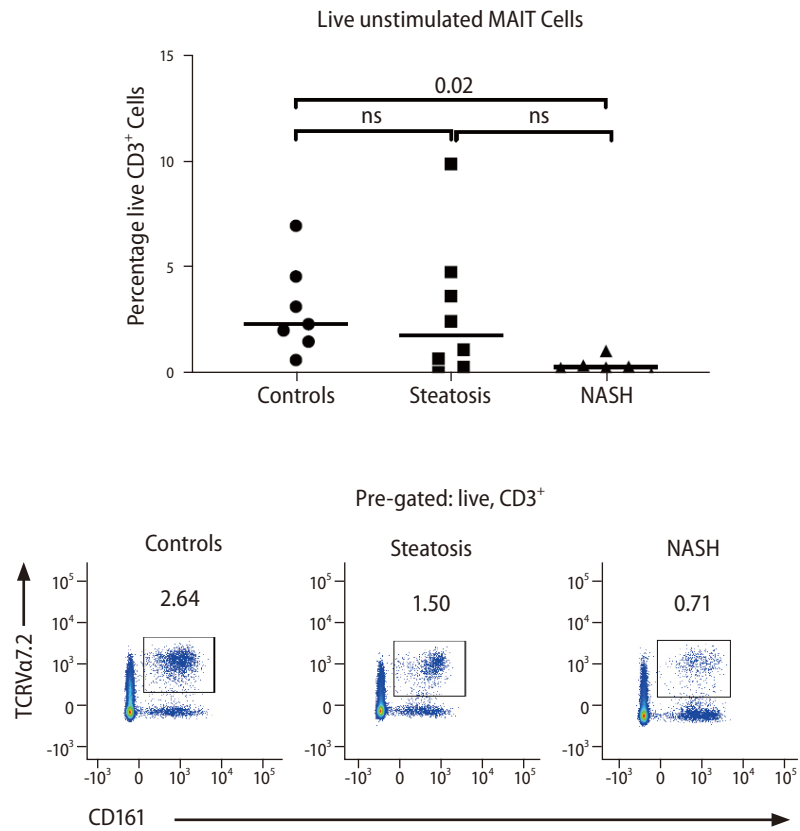

**Supplementary Figure 6.** Reduction in activated MAIT cells in patients with NASH compared to controls using classical fluorescence flow cytometry. Representative gating strategy to identify the proportion of live, singlet CD3<sup>+</sup> leukocytes that are CD161+TCRVα7.2+.
